# Supplementary material for: Short-Term Calorie Restriction in Male Mice Feminizes Gene Expression and Alters Key Regulators of Conserved Aging Regulatory Pathways
Source: PLoS One. 2009 Apr 16;4(4):e5242. doi: 10.1371/journal.pone.0005242 (PMC2667255; doi:10.1371/journal.pone.0005242)
Supplement: Table S1 — Quantitative RT-PCR fold-changes and array fold-changes for selected transcripts. Positive fold changes are ratios of CR/HIGHCAL and negative fold changes are negative values of ratios of HIGHCAL/CR. Unless denoted as not significant (NS) all listed RT-PCR values are significant at P<0.05. (0.02 MB XLS) [file pone.0005242.s001.xls]

## Sheet: Q-RT-PCR
Table S1. Quantitative RT-PCR fold-changes and array fold-changes for selected transcripts. Positive fold changes are ratios of CR/HIGHCAL and negative fold changes are negative values of ratios of HIGHCAL/CR. Unless denoted as not significant (NS) all listed RT-PCR values are significant at P<0.05.
	Fold change CR/HIGHCAL
Gene Name	Q-RT-PCR	Array
Ar	-2	-2.8
Blm	4.2	4.7
Cdkn1a	21.7	10.2
Ddit4	80.1	33.3
Foxo1	3	1.5
Foxo3	3.1	1.5
Fst	12.9	13.3
G6pc (G6pase)	2.6	1.9
Ghbp	-4.4	N/A
Ghr	-4	-2.1
Igf1	NS	-1.1
Igfbp3	4.9	1.2
Igfbp4	NS	1.1
Igfbp7	NS	1.2
Klkb1	-2.4	-2.2
Lepr	49.3	58.4
Mttp	NS	1.1
Nnmt	47.8	36.5
Ppargc1a (Pgc1)	7.3	6
Rpl4	1.8	1.2
Sgk	9.4	4.6
Sgk2	-2	-1.4
Tert	-2.5	-2.9
Trp53inp1	10.8	5.7
N/A: A separate primer pair was used to assay Ghbp levels. No separate probe for Ghbp is present on our arrays.
NS: Not significant.
