# Supplementary material for: Short-Term Calorie Restriction in Male Mice Feminizes Gene Expression and Alters Key Regulators of Conserved Aging Regulatory Pathways
Source: PLoS One. 2009 Apr 16;4(4):e5242. doi: 10.1371/journal.pone.0005242 (PMC2667255; doi:10.1371/journal.pone.0005242)
Supplement: Table S3 — Significantly over-represented Gene Ontology (GO) terms returned by FuncAssociate at an adjusted P-value cutoff of p<0.05. GO terms are listed in descending order of significance for each input gene set. Six sets are shown: genes UPREGULATED by CR, genes DOWNREGULATED by CR, and the combined list of genes both up- and DOWNREGULATED by CR, for both statistical cutoffs, q<0.01 and q<0.1. Rank is the position in the attribute list ranked by significance of association with the given query; N is the number of genes in the query with this attribute; X is the number of genes overall in the query universe with this attribute; LOD is the natural log of the odds ratio; P is the single hypothesis one-sided P-value of the association between attribute and query (based on Fisher's Exact Test); and P-adj is the adjusted P-value: fraction (as a %) of 1000 null-hypothesis simulations having attributes with this single-hypothesis P value or smaller. (0.10 MB XLS) [file pone.0005242.s003.xls]

## Sheet: GO Attributes
Table S3. Significantly over-represented Gene Ontology (GO) terms returned by FuncAssociate at an adjusted P-value cutoff of p<0.05. GO terms are listed in descending order of significance for each input gene set. Six sets are shown: genes UPREGULATED by CR, genes DOWNREGULATED by CR, and the combined list of genes both up- and DOWNREGULATED by CR, for both statistical cutoffs, q<0.01 and q<0.1. …
q<0.01
UPREGULATED in CR relative to HIGHCAL.
Size of query set: 827
OVERREPRESENTED ATTRIBUTES
Rank	N	X	LOD	P	P-adj	GO Attribute
1	345	4477	0.349	5.6e-27	<0.001	0008152: metabolism/metabolic process
2	329	4219	0.349	2.7e-26	<0.001	0044237: cellular metabolism
3	426	6089	0.329	4.9e-26	<0.001	0050875: cellular physiological process/cell growth and/or maintenance/cell physiology
4	314	4053	0.338	2.9e-24	<0.001	0044238: primary metabolism
5	476	7257	0.311	8.7e-24	<0.001	0009987: cellular process
6	457	6935	0.303	1.1e-22	<0.001	0007582: physiological process
7	339	4802	0.291	1.8e-19	<0.001	0005622: intracellular/protoplasm
8	298	4151	0.285	1.4e-17	<0.001	0043226: organelle
9	298	4151	0.285	1.4e-17	<0.001	0043229: intracellular organelle
10	241	3291	0.276	1.1e-14	<0.001	0003824: catalytic activity/enzyme activity
11	443	7263	0.237	1.4e-14	<0.001	0005623: cell
12	260	3660	0.265	2.3e-14	<0.001	0043231: intracellular membrane-bound organelle
13	260	3660	0.265	2.3e-14	<0.001	0043227: membrane-bound organelle
14	160	1911	0.322	3.3e-14	<0.001	0044260: cellular macromolecule metabolism
15	164	2006	0.31	1.1e-13	<0.001	0043170: macromolecule metabolism
16	351	5574	0.222	2.3e-12	<0.001	0005488: binding/ligand
17	180	2367	0.277	3.7e-12	<0.001	0005634: nucleus
18	140	1770	0.285	1.2e-10	<0.001	0044267: cellular protein metabolism
19	140	1782	0.282	1.9e-10	<0.001	0019538: protein metabolism/protein metabolism and modification
20	113	1337	0.312	2.2e-10	<0.001	0016787: hydrolase activity
21	164	2256	0.248	1.4e-09	<0.001	0005737: cytoplasm
22	63	605	0.402	1.4e-09	<0.001	0044249: cellular biosynthesis
23	139	1864	0.254	7e-09	<0.001	0043283: biopolymer metabolism
24	150	2069	0.243	1e-08	<0.001	0050789: regulation of biological process/regulation
25	45	389	0.45	1.5e-08	<0.001	0009059: macromolecule biosynthesis
26	133	1810	0.245	3.9e-08	<0.001	0003676: nucleic acid binding
27	60	615	0.369	4e-08	<0.001	0009056: catabolism
28	56	558	0.382	4.4e-08	<0.001	0044248: cellular catabolism
29	139	1921	0.239	4.6e-08	<0.001	0050794: regulation of cellular process
30	64	691	0.344	9.7e-08	<0.001	0009058: biosynthesis/anabolism
31	9	20	1.235	1e-07	<0.001	0043086: negative regulation of enzyme activity
32	9	20	1.235	1e-07	<0.001	0051348: negative regulation of transferase activity/transferase inhibitor
33	9	20	1.235	1e-07	<0.001	0006469: negative regulation of protein kinase activity
34	163	2386	0.214	1.2e-07	<0.001	0005515: protein binding/protein amino acid binding
35	138	1970	0.222	3.5e-07	<0.001	0006139: nucleobase, nucleoside, nucleotide and nucleic acid metabolism
36	12	44	0.904	4.8e-07	<0.001	0051338: regulation of transferase activity/transferase regulator
37	12	44	0.904	4.8e-07	<0.001	0045859: regulation of protein kinase activity
38	130	1845	0.223	6e-07	<0.001	0051244: regulation of cellular physiological process
39	133	1903	0.219	6.8e-07	<0.001	0050791: regulation of physiological process
40	35	315	0.427	1.6e-06	0.001	0006915: apoptosis/type I programmed cell death
41	37	344	0.411	1.7e-06	0.001	0006412: protein biosynthesis
42	38	358	0.405	1.7e-06	0.001	0048518: positive regulation of biological process
43	35	317	0.424	1.8e-06	0.001	0012501: programmed cell death
44	36	340	0.404	3.5e-06	0.002	0008219: cell death
45	36	345	0.396	4.8e-06	0.003	0016265: death
46	38	380	0.376	7.2e-06	0.005	0016788: hydrolase activity, acting on ester bonds/esterase
47	19	129	0.567	7.6e-06	0.005	0005840: ribosome
48	15	86	0.655	8.6e-06	0.007	0050790: regulation of enzyme activity
49	7	18	1.131	9.1e-06	0.007	0007586: digestion
50	43	464	0.339	1.3e-05	0.007	0044265: cellular macromolecule catabolism
51	43	480	0.323	2.8e-05	0.019	0009057: macromolecule catabolism
52	40	436	0.334	3.2e-05	0.021	0008233: peptidase activity/hydrolase, acting on peptide bonds/peptide hydrolase/protease
53	21	169	0.481	3.7e-05	0.025	0044262: cellular carbohydrate metabolism
54	23	195	0.455	3.7e-05	0.025	0042578: phosphoric ester hydrolase activity
55	37	402	0.335	5.8e-05	0.042	0006508: proteolysis and peptidolysis
56	37	402	0.335	5.8e-05	0.042	0044257: cellular protein catabolism
57	4	6	1.571	6.4e-05	0.049	0019203: carbohydrate phosphatase activity
q<0.01
DOWNREGULATED in CR relative to HIGHCAL.
Size of query set: 1070
OVERREPRESENTED ATTRIBUTES
Rank	N	X	LOD	P	P-adj	GO Attribute
1	614	7263	0.312	5.7e-30	<0.001	0005623: cell
2	265	2256	0.389	3.3e-29	<0.001	0005737: cytoplasm
3	585	6935	0.297	2.5e-27	<0.001	0007582: physiological process
4	334	3291	0.327	1.5e-25	<0.001	0003824: catalytic activity/enzyme activity
5	522	6089	0.283	1.4e-24	<0.001	0050875: cellular physiological process/cell growth and/or maintenance/cell physiology
6	437	4802	0.293	1.5e-24	<0.001	0005622: intracellular/protoplasm
7	583	7257	0.258	3.5e-21	<0.001	0009987: cellular process
8	341	3660	0.278	1.3e-19	<0.001	0043231: intracellular membrane-bound organelle
9	341	3660	0.278	1.3e-19	<0.001	0043227: membrane-bound organelle
10	371	4151	0.262	1.6e-18	<0.001	0043226: organelle
11	371	4151	0.262	1.6e-18	<0.001	0043229: intracellular organelle
12	384	4477	0.24	3.3e-16	<0.001	0008152: metabolism/metabolic process
13	354	4219	0.218	2.9e-13	<0.001	0044237: cellular metabolism
14	70	480	0.449	3.7e-12	<0.001	0016491: oxidoreductase activity/redox activity
15	55	358	0.472	1.1e-10	<0.001	0005783: endoplasmic reticulum/ER
16	294	3516	0.203	1.4e-10	<0.001	0016020: membrane
17	23	84	0.785	4.6e-10	<0.001	0008202: steroid metabolism
18	51	334	0.468	6.5e-10	<0.001	0006629: lipid metabolism
19	44	268	0.505	9.8e-10	<0.001	0044255: cellular lipid metabolism
20	325	4053	0.184	1.3e-09	<0.001	0044238: primary metabolism
21	115	1134	0.272	1.3e-08	<0.001	0016740: transferase activity
22	416	5574	0.157	2.6e-08	<0.001	0005488: binding/ligand
23	41	278	0.448	8.3e-08	<0.001	0000267: cell fraction
24	65	558	0.332	2e-07	<0.001	0005739: mitochondrion
25	46	346	0.396	3.2e-07	0.001	0006091: generation of precursor metabolites and energy/energy pathways
26	20	92	0.653	4e-07	0.002	0005773: vacuole
27	13	41	0.875	4.4e-07	0.002	0016125: sterol metabolism
28	19	86	0.662	6e-07	0.002	0000323: lytic vacuole
29	19	86	0.662	6e-07	0.002	0005764: lysosome
30	25	142	0.539	1.1e-06	0.003	0006066: alcohol metabolism
31	220	2727	0.169	1.1e-06	0.003	0016021: integral to membrane/transmembrane
32	220	2729	0.169	1.2e-06	0.003	0031224: intrinsic to membrane
33	48	388	0.36	1.5e-06	0.003	0006955: immune response
34	133	1498	0.206	2.2e-06	0.003	0006810: transport
35	17	78	0.655	2.8e-06	0.004	0016614: oxidoreductase activity, acting on CH-OH group of donors
36	33	231	0.431	3.1e-06	0.004	0006118: electron transport/electron transfer
37	61	555	0.302	3.3e-06	0.004	0009607: response to biotic stimulus
38	133	1517	0.2	4.1e-06	0.004	0051234: establishment of localization
39	134	1532	0.199	4.3e-06	0.004	0051179: localization/establishment and maintenance of position/establishment and maintenance of substrate location/positioning
40	12	44	0.784	7.1e-06	0.007	0006694: steroid biosynthesis/steroidogenesis
41	11	38	0.82	9.1e-06	0.009	0008203: cholesterol metabolism
42	10	32	0.868	1.1e-05	0.009	0016410: N-acyltransferase activity
43	118	1337	0.201	1.1e-05	0.009	0016787: hydrolase activity
44	4	4	2.151	1.3e-05	0.013	0006072: glycerol-3-phosphate metabolism
45	53	481	0.302	1.3e-05	0.013	0006952: defense response/defence response
46	15	73	0.623	2.3e-05	0.022	0016616: oxidoreductase activity, acting on the CH-OH group of donors, NAD or NADP as acceptor
47	64	633	0.261	2.8e-05	0.023	0000004: biological process unknown
48	18	101	0.546	2.8e-05	0.023	0016853: isomerase activity
49	167	2069	0.161	2.8e-05	0.023	0050789: regulation of biological process/regulation
50	32	249	0.377	3.8e-05	0.03	0005624: membrane fraction
51	156	1921	0.163	4e-05	0.031	0050794: regulation of cellular process
52	39	332	0.333	4.5e-05	0.031	0016462: pyrophosphatase activity
53	7	18	1.012	4.8e-05	0.033	0016126: sterol biosynthesis
54	39	334	0.33	5.2e-05	0.034	0016818: hydrolase activity, acting on acid anhydrides, in phosphorus-containing anhydrides
55	39	334	0.33	5.2e-05	0.034	0016817: hydrolase activity, acting on acid anhydrides
56	6	13	1.135	5.4e-05	0.036	0042398: amino acid derivative biosynthesis
57	12	53	0.678	5.5e-05	0.036	0005777: peroxisome/peroxisome vesicle
58	12	53	0.678	5.5e-05	0.036	0042579: microbody
59	9	31	0.824	5.9e-05	0.036	0005625: soluble fraction/soluble
60	4	5	1.674	6.1e-05	0.048	0007034: vacuolar transport
61	186	2386	0.145	7e-05	0.048	0005515: protein binding/protein amino acid binding
q<0.01
ALL COMBINED UPREGULATED and DOWNREGULATED genes in CR relative to HIGHCAL.
Size of query set: 1897
OVERREPRESENTED ATTRIBUTES
Rank	N	X	LOD	P	P-adj	GO Attribute
1	948	6089	0.322	2.1e-51	<0.001	0050875: cellular physiological process/cell growth and/or maintenance/cell physiology
2	1042	6935	0.318	5.9e-51	<0.001	0007582: physiological process
3	1059	7257	0.299	3.1e-45	<0.001	0009987: cellular process
4	776	4802	0.312	8.6e-45	<0.001	0005622: intracellular/protoplasm
5	1057	7263	0.296	1.9e-44	<0.001	0005623: cell
6	729	4477	0.308	2.1e-42	<0.001	0008152: metabolism/metabolic process
7	575	3291	0.326	1.3e-40	<0.001	0003824: catalytic activity/enzyme activity
8	683	4219	0.296	5.2e-38	<0.001	0044237: cellular metabolism
9	429	2256	0.354	9.8e-38	<0.001	0005737: cytoplasm
10	669	4151	0.29	2.4e-36	<0.001	0043226: organelle
11	669	4151	0.29	2.4e-36	<0.001	0043229: intracellular organelle
12	601	3660	0.291	3.4e-34	<0.001	0043231: intracellular membrane-bound organelle
13	601	3660	0.291	3.4e-34	<0.001	0043227: membrane-bound organelle
14	639	4053	0.271	3e-31	<0.001	0044238: primary metabolism
15	767	5574	0.197	1.8e-19	<0.001	0005488: binding/ligand
16	231	1337	0.27	1.2e-14	<0.001	0016787: hydrolase activity
17	314	2006	0.224	1.1e-13	<0.001	0043170: macromolecule metabolism
18	300	1911	0.224	3.1e-13	<0.001	0044260: cellular macromolecule metabolism
19	357	2367	0.207	3.2e-13	<0.001	0005634: nucleus
20	317	2069	0.212	1.3e-12	<0.001	0050789: regulation of biological process/regulation
21	295	1921	0.211	7.4e-12	<0.001	0050794: regulation of cellular process
22	193	1134	0.258	9.7e-12	<0.001	0016740: transferase activity
23	349	2386	0.188	3.7e-11	<0.001	0005515: protein binding/protein amino acid binding
24	129	691	0.302	8.5e-11	<0.001	0009058: biosynthesis/anabolism
25	98	480	0.348	1.2e-10	<0.001	0016491: oxidoreductase activity/redox activity
26	115	605	0.31	3.1e-10	<0.001	0044249: cellular biosynthesis
27	76	346	0.387	4.9e-10	<0.001	0006091: generation of precursor metabolites and energy/energy pathways
28	115	615	0.301	8.4e-10	<0.001	0009056: catabolism
29	475	3516	0.152	9.8e-10	<0.001	0016020: membrane
30	275	1845	0.192	1.1e-09	<0.001	0051244: regulation of cellular physiological process
31	73	334	0.383	1.3e-09	<0.001	0006629: lipid metabolism
32	41	142	0.543	1.4e-09	<0.001	0006066: alcohol metabolism
33	106	558	0.309	1.6e-09	<0.001	0044248: cellular catabolism
34	281	1903	0.187	1.8e-09	<0.001	0050791: regulation of physiological process
35	115	633	0.285	4.8e-09	<0.001	0000004: biological process unknown
36	273	1864	0.182	7.1e-09	<0.001	0043283: biopolymer metabolism
37	72	340	0.366	7.2e-09	<0.001	0008219: cell death
38	68	315	0.376	8.4e-09	<0.001	0006915: apoptosis/type I programmed cell death
39	261	1770	0.184	8.6e-09	<0.001	0044267: cellular protein metabolism
40	68	317	0.372	1.1e-08	<0.001	0012501: programmed cell death
41	103	558	0.293	1.3e-08	<0.001	0005739: mitochondrion
42	74	358	0.352	1.3e-08	<0.001	0005783: endoplasmic reticulum/ER
43	72	345	0.357	1.4e-08	<0.001	0016265: death
44	284	1970	0.174	1.6e-08	<0.001	0006139: nucleobase, nucleoside, nucleotide and nucleic acid metabolism
45	261	1782	0.181	1.6e-08	<0.001	0019538: protein metabolism/protein metabolism and modification
46	28	84	0.632	1.8e-08	<0.001	0008202: steroid metabolism
47	43	169	0.468	3.6e-08	<0.001	0044262: cellular carbohydrate metabolism
48	59	268	0.386	3.9e-08	<0.001	0044255: cellular lipid metabolism
49	55	250	0.385	1.1e-07	<0.001	0005975: carbohydrate metabolism
50	59	278	0.365	1.5e-07	<0.001	0000267: cell fraction
51	28	94	0.561	2.7e-07	<0.001	0042598: vesicular fraction
52	28	94	0.561	2.7e-07	<0.001	0005792: microsome
53	103	597	0.256	4.2e-07	<0.001	0008372: cellular component unknown
54	73	383	0.307	4.9e-07	<0.001	0048519: negative regulation of biological process
55	27	92	0.552	6.1e-07	<0.001	0005773: vacuole
56	69	358	0.313	6.6e-07	<0.001	0048518: positive regulation of biological process
57	50	231	0.376	7e-07	<0.001	0006118: electron transport/electron transfer
58	72	380	0.304	7.4e-07	<0.001	0016788: hydrolase activity, acting on ester bonds/esterase
59	11	20	1.01	1.3e-06	0.001	0043086: negative regulation of enzyme activity
60	11	20	1.01	1.3e-06	0.001	0051348: negative regulation of transferase activity/transferase inhibitor
61	11	20	1.01	1.3e-06	0.001	0006469: negative regulation of protein kinase activity
62	52	250	0.354	1.5e-06	0.001	0031090: organelle membrane
63	25	86	0.546	1.9e-06	0.001	0000323: lytic vacuole
64	25	86	0.546	1.9e-06	0.001	0005764: lysosome
65	38	162	0.42	2e-06	0.002	0050793: regulation of development
66	102	613	0.236	2.7e-06	0.002	0005554: molecular function unknown
67	24	82	0.551	2.7e-06	0.002	0004497: monooxygenase activity
68	251	1810	0.149	3e-06	0.002	0003676: nucleic acid binding
69	213	1498	0.16	3.5e-06	0.002	0006810: transport
70	41	185	0.388	3.7e-06	0.003	0042981: regulation of apoptosis
71	41	186	0.385	4.2e-06	0.003	0043067: regulation of programmed cell death
72	358	2729	0.125	4.4e-06	0.003	0031224: intrinsic to membrane
73	216	1532	0.156	5.3e-06	0.004	0051179: localization/establishment and maintenance of position/establishment and maintenance of substrate location/positioning
74	357	2727	0.124	5.5e-06	0.004	0016021: integral to membrane/transmembrane
75	214	1517	0.156	5.7e-06	0.004	0051234: establishment of localization
76	70	389	0.276	7e-06	0.006	0009059: macromolecule biosynthesis
77	80	464	0.254	8.4e-06	0.006	0044265: cellular macromolecule catabolism
78	61	332	0.287	1.4e-05	0.011	0016462: pyrophosphatase activity
79	41	195	0.359	1.4e-05	0.011	0042578: phosphoric ester hydrolase activity
80	49	249	0.323	1.5e-05	0.011	0005624: membrane fraction
81	43	209	0.347	1.6e-05	0.012	0006807: nitrogen compound metabolism
82	81	480	0.242	1.7e-05	0.012	0009057: macromolecule catabolism
83	61	334	0.283	1.7e-05	0.012	0016818: hydrolase activity, acting on acid anhydrides, in phosphorus-containing anhydrides
84	61	334	0.283	1.7e-05	0.012	0016817: hydrolase activity, acting on acid anhydrides
85	80	473	0.243	1.7e-05	0.012	0030154: cell differentiation
86	106	672	0.208	1.9e-05	0.014	0016772: transferase activity, transferring phosphorus-containing groups
87	23	86	0.497	2.2e-05	0.014	0050790: regulation of enzyme activity
88	53	281	0.3	2.4e-05	0.014	0019752: carboxylic acid metabolism
89	53	281	0.3	2.4e-05	0.014	0006082: organic acid metabolism
90	15	44	0.648	2.7e-05	0.019	0051338: regulation of transferase activity/transferase regulator
91	15	44	0.648	2.7e-05	0.019	0045859: regulation of protein kinase activity
92	15	44	0.648	2.7e-05	0.019	0006694: steroid biosynthesis/steroidogenesis
93	56	304	0.288	2.8e-05	0.019	0048522: positive regulation of cellular process
94	40	195	0.345	3.3e-05	0.019	0009308: amine metabolism
95	62	351	0.265	4.1e-05	0.03	0048523: negative regulation of cellular process
96	163	1141	0.159	4.1e-05	0.03	0043167: ion binding
97	163	1141	0.159	4.1e-05	0.03	0046872: metal ion binding/metal binding
98	14	41	0.649	4.9e-05	0.032	0016125: sterol metabolism
99	190	1368	0.146	5e-05	0.034	0007275: development
100	33	155	0.366	7.3e-05	0.041	0016791: phosphoric monoester hydrolase activity/phosphatase
101	66	388	0.246	7.7e-05	0.047	0006955: immune response
102	182	1312	0.145	7.7e-05	0.047	0003677: DNA binding
103	102	664	0.194	7.9e-05	0.047	0016043: cell organization and biogenesis
q<0.1
UPREGULATED in CR relative to HIGHCAL.
Size of query set: 1610
OVERREPRESENTED ATTRIBUTES
Rank	N	X	LOD	P	P-adj	GO Attribute
1	862	6089	0.336	1e-50	<0.001	0050875: cellular physiological process/cell growth and/or maintenance/cell physiology
2	681	4477	0.341	2.3e-47	<0.001	0008152: metabolism/metabolic process
3	646	4219	0.337	3.6e-45	<0.001	0044237: cellular metabolism
4	622	4053	0.333	2.5e-43	<0.001	0044238: primary metabolism
5	921	6935	0.304	2.4e-42	<0.001	0007582: physiological process
6	698	4802	0.314	2.4e-41	<0.001	0005622: intracellular/protoplasm
7	947	7257	0.297	1.2e-40	<0.001	0009987: cellular process
8	612	4151	0.305	1.2e-36	<0.001	0043226: organelle
9	612	4151	0.305	1.2e-36	<0.001	0043229: intracellular organelle
10	534	3660	0.284	1.3e-29	<0.001	0043231: intracellular membrane-bound organelle
11	534	3660	0.284	1.3e-29	<0.001	0043227: membrane-bound organelle
12	730	5574	0.248	1.6e-27	<0.001	0005488: binding/ligand
13	896	7263	0.238	8.8e-27	<0.001	0005623: cell
14	319	1911	0.328	4.6e-26	<0.001	0044260: cellular macromolecule metabolism
15	329	2006	0.319	1.5e-25	<0.001	0043170: macromolecule metabolism
16	290	1770	0.312	2.8e-22	<0.001	0044267: cellular protein metabolism
17	102	389	0.551	4.3e-22	<0.001	0009059: macromolecule biosynthesis
18	360	2367	0.28	5.7e-22	<0.001	0005634: nucleus
19	290	1782	0.308	7.9e-22	<0.001	0019538: protein metabolism/protein metabolism and modification
20	290	1810	0.299	8.6e-21	<0.001	0003676: nucleic acid binding
21	92	344	0.561	1.1e-20	<0.001	0006412: protein biosynthesis
22	130	605	0.44	1.6e-19	<0.001	0044249: cellular biosynthesis
23	142	691	0.416	2.1e-19	<0.001	0009058: biosynthesis/anabolism
24	337	2256	0.266	3.5e-19	<0.001	0005737: cytoplasm
25	447	3291	0.225	1e-17	<0.001	0003824: catalytic activity/enzyme activity
26	70	245	0.597	1.1e-17	<0.001	0030529: ribonucleoprotein complex/RNP
27	48	129	0.765	1.4e-17	<0.001	0005840: ribosome
28	50	148	0.7	3e-16	<0.001	0003735: structural constituent of ribosome/ribosomal protein
29	291	1970	0.253	8.3e-16	<0.001	0006139: nucleobase, nucleoside, nucleotide and nucleic acid metabolism
30	75	298	0.522	1.6e-15	<0.001	0003723: RNA binding
31	276	1864	0.253	4.1e-15	<0.001	0043283: biopolymer metabolism
32	31	72	0.867	6.9e-14	<0.001	0042254: ribosome biogenesis and assembly
33	32	80	0.813	3.3e-13	<0.001	0007028: cytoplasm organization and biogenesis
34	28	65	0.867	1.1e-12	<0.001	0007046: ribosome biogenesis
35	22	44	0.985	7.4e-12	<0.001	0005830: cytosolic ribosome (sensu Eukaryota)/80S ribosome
36	188	1247	0.251	4.1e-11	<0.001	0043234: protein complex
37	61	278	0.441	3.3e-10	<0.001	0016070: RNA metabolism
38	52	231	0.454	2.6e-09	<0.001	0006396: RNA processing
39	273	2069	0.187	2.7e-09	<0.001	0050789: regulation of biological process/regulation
40	256	1921	0.191	3.7e-09	<0.001	0050794: regulation of cellular process
41	244	1845	0.186	1.9e-08	<0.001	0051244: regulation of cellular physiological process
42	249	1903	0.18	3.4e-08	<0.001	0050791: regulation of physiological process
43	300	2386	0.163	5.6e-08	<0.001	0005515: protein binding/protein amino acid binding
44	182	1312	0.205	5.7e-08	<0.001	0003677: DNA binding
45	184	1334	0.203	7.3e-08	<0.001	0006350: transcription
46	126	834	0.245	7.5e-08	<0.001	0043228: non-membrane-bound organelle
47	126	834	0.245	7.5e-08	<0.001	0043232: intracellular non-membrane-bound organelle
48	183	1337	0.198	1.4e-07	<0.001	0016787: hydrolase activity
49	175	1288	0.194	4.3e-07	<0.001	0045449: regulation of transcription
50	175	1294	0.191	5.9e-07	<0.001	0019219: regulation of nucleobase, nucleoside, nucleotide and nucleic acid metabolism
51	173	1277	0.192	6.1e-07	<0.001	0006351: transcription, DNA-dependent
52	170	1255	0.191	7.8e-07	<0.001	0006355: regulation of transcription, DNA-dependent
53	156	1134	0.198	9.2e-07	<0.001	0016740: transferase activity
54	101	664	0.246	1.1e-06	<0.001	0016043: cell organization and biogenesis
55	186	1406	0.18	1.1e-06	<0.001	0019222: regulation of metabolism
56	182	1377	0.179	1.6e-06	<0.001	0031323: regulation of cellular metabolism
57	21	73	0.596	2.5e-06	0.003	0008135: translation factor activity, nucleic acid binding
58	137	989	0.2	3e-06	0.003	0043412:
59	47	250	0.354	3.9e-06	0.004	0031090: organelle membrane
60	121	854	0.211	3.9e-06	0.004	0030528: transcription regulator activity
61	10	20	0.982	4.3e-06	0.005	0043086: negative regulation of enzyme activity
62	10	20	0.982	4.3e-06	0.005	0051348: negative regulation of transferase activity/transferase inhibitor
63	10	20	0.982	4.3e-06	0.005	0006469: negative regulation of protein kinase activity
64	39	194	0.39	4.9e-06	0.007	0016071: mRNA metabolism
65	146	1079	0.189	5.2e-06	0.007	0000166: nucleotide binding
66	59	346	0.303	6.3e-06	0.008	0006091: generation of precursor metabolites and energy/energy pathways
67	21	77	0.564	6.3e-06	0.008	0045182: translation regulator activity
68	15	44	0.703	6.8e-06	0.009	0051338: regulation of transferase activity/transferase regulator
69	15	44	0.703	6.8e-06	0.009	0045859: regulation of protein kinase activity
70	9	17	1.03	7.3e-06	0.011	0016282: eukaryotic 43S preinitiation complex/eukaryotic 43S pre-initiation complex
71	127	924	0.195	1e-05	0.013	0006464: protein modification
72	36	179	0.391	1.1e-05	0.013	0006397: mRNA processing
73	31	145	0.424	1.2e-05	0.013	0008380: RNA splicing
74	10	22	0.906	1.3e-05	0.013	0015935: small ribosomal subunit
75	54	315	0.306	1.3e-05	0.013	0006915: apoptosis/type I programmed cell death
76	54	317	0.302	1.6e-05	0.013	0012501: programmed cell death
77	36	182	0.381	1.6e-05	0.014	0042623: ATPase activity, coupled
78	6	8	1.396	1.7e-05	0.015	0019843: rRNA binding
79	22	89	0.506	2.1e-05	0.016	0005743: mitochondrial inner membrane
80	30	144	0.41	2.9e-05	0.019	0000375: RNA splicing, via transesterification reactions
81	30	144	0.41	2.9e-05	0.019	0000377: RNA splicing, via transesterification reactions with bulged adenosine as nucleophile/lariat RNA formation
82	30	144	0.41	2.9e-05	0.019	0000398: nuclear mRNA splicing, via spliceosome/mRNA splicing/pre-mRNA splicing
83	26	117	0.446	3e-05	0.019	0005740: mitochondrial membrane
84	10	24	0.842	3.2e-05	0.02	0016072: rRNA metabolism
85	7	12	1.116	3.5e-05	0.021	0016283: eukaryotic 48S initiation complex
86	7	12	1.116	3.5e-05	0.021	0005843: cytosolic small ribosomal subunit (sensu Eukaryota)/40S ribosomal subunit/cytosolic small ribosomal subunit
87	37	196	0.356	3.6e-05	0.021	0016887: ATPase activity/ATP phosphohydrolase/adenosinetriphosphatase
88	82	558	0.227	4e-05	0.023	0044248: cellular catabolism
89	44	250	0.319	4.2e-05	0.032	0005975: carbohydrate metabolism
90	56	345	0.277	4.6e-05	0.033	0016265: death
91	88	615	0.213	5.7e-05	0.038	0009056: catabolism
92	55	340	0.275	5.8e-05	0.038	0008219: cell death
93	138	1059	0.168	6.1e-05	0.038	0017076: purine nucleotide binding
94	38	209	0.336	6.7e-05	0.042	0006807: nitrogen compound metabolism
q<0.1
DOWNREGULATED in CR relative to HIGHCAL.
Size of query set: 2162
OVERREPRESENTED ATTRIBUTES
Rank	N	X	LOD	P	P-adj	GO Attribute
1	663	3291	0.342	1.7e-49	<0.001	0003824: catalytic activity/enzyme activity
2	1197	7263	0.294	6.1e-49	<0.001	0005623: cell
3	1144	6935	0.283	1.6e-45	<0.001	0007582: physiological process
4	490	2256	0.364	5.6e-44	<0.001	0005737: cytoplasm
5	1025	6089	0.277	1.7e-42	<0.001	0050875: cellular physiological process/cell growth and/or maintenance/cell physiology
6	852	4802	0.286	7.2e-42	<0.001	0005622: intracellular/protoplasm
7	676	3660	0.287	8.7e-37	<0.001	0043231: intracellular membrane-bound organelle
8	676	3660	0.287	8.7e-37	<0.001	0043227: membrane-bound organelle
9	740	4151	0.273	1.8e-35	<0.001	0043226: organelle
10	740	4151	0.273	1.8e-35	<0.001	0043229: intracellular organelle
11	1137	7257	0.239	4.3e-33	<0.001	0009987: cellular process
12	759	4477	0.241	6.9e-29	<0.001	0008152: metabolism/metabolic process
13	701	4219	0.22	1.7e-23	<0.001	0044237: cellular metabolism
14	106	358	0.501	3.3e-19	<0.001	0005783: endoplasmic reticulum/ER
15	656	4053	0.198	1e-18	<0.001	0044238: primary metabolism
16	232	1134	0.295	9e-17	<0.001	0016740: transferase activity
17	571	3516	0.191	3.1e-16	<0.001	0016020: membrane
18	122	480	0.409	4.1e-16	<0.001	0016491: oxidoreductase activity/redox activity
19	839	5574	0.167	8.6e-16	<0.001	0005488: binding/ligand
20	253	1337	0.252	5.4e-14	<0.001	0016787: hydrolase activity
21	90	334	0.441	8.7e-14	<0.001	0006629: lipid metabolism
22	76	268	0.47	4.5e-13	<0.001	0044255: cellular lipid metabolism
23	126	558	0.341	1.5e-12	<0.001	0005739: mitochondrion
24	92	391	0.361	1.7e-10	<0.001	0015031: protein transport/enzyme transport
25	33	84	0.679	2.1e-10	<0.001	0008202: steroid metabolism
26	261	1498	0.206	2.2e-10	<0.001	0006810: transport
27	332	2006	0.182	3.1e-10	<0.001	0043170: macromolecule metabolism
28	263	1517	0.203	3.1e-10	<0.001	0051234: establishment of localization
29	265	1532	0.202	3.4e-10	<0.001	0051179: localization/establishment and maintenance of position/establishment and maintenance of substrate location/positioning
30	92	404	0.342	1e-09	<0.001	0045184: establishment of protein localization/protein positioning/protein recruitment
31	24	53	0.784	2e-09	<0.001	0005777: peroxisome/peroxisome vesicle
32	24	53	0.784	2e-09	<0.001	0042579: microbody
33	94	421	0.331	2e-09	<0.001	0008104: protein localization
34	314	1911	0.176	2.3e-09	<0.001	0044260: cellular macromolecule metabolism
35	30	78	0.664	2.5e-09	<0.001	0016614: oxidoreductase activity, acting on CH-OH group of donors
36	21	44	0.826	6.3e-09	<0.001	0006694: steroid biosynthesis/steroidogenesis
37	422	2727	0.149	7.8e-09	<0.001	0016021: integral to membrane/transmembrane
38	422	2729	0.149	8.6e-09	<0.001	0031224: intrinsic to membrane
39	40	130	0.517	1.2e-08	<0.001	0008610: lipid biosynthesis
40	79	346	0.342	1.4e-08	<0.001	0006091: generation of precursor metabolites and energy/energy pathways
41	134	691	0.255	1.5e-08	<0.001	0009058: biosynthesis/anabolism
42	200	1141	0.204	2.2e-08	<0.001	0043167: ion binding
43	200	1141	0.204	2.2e-08	<0.001	0046872: metal ion binding/metal binding
44	301	1864	0.165	3.2e-08	<0.001	0043283: biopolymer metabolism
45	187	1059	0.207	3.8e-08	<0.001	0017076: purine nucleotide binding
46	27	73	0.637	4.1e-08	<0.001	0016616: oxidoreductase activity, acting on the CH-OH group of donors, NAD or NADP as acceptor
47	189	1079	0.203	5.9e-08	<0.001	0000166: nucleotide binding
48	19	42	0.783	9.9e-08	<0.001	0016765: transferase activity, transferring alkyl or aryl (other than methyl) groups/transferase activity, transferring alkyl or aryl groups, other than methyl groups
49	74	332	0.328	1.1e-07	<0.001	0016462: pyrophosphatase activity
50	74	334	0.325	1.4e-07	<0.001	0016818: hydrolase activity, acting on acid anhydrides, in phosphorus-containing anhydrides
51	74	334	0.325	1.4e-07	<0.001	0016817: hydrolase activity, acting on acid anhydrides
52	118	615	0.248	1.9e-07	<0.001	0009056: catabolism
53	65	285	0.341	2.7e-07	<0.001	0005794: Golgi apparatus/Golgi complex/Golgi ribbon
54	80	378	0.3	3.5e-07	<0.001	0046907: intracellular transport
55	64	281	0.34	3.5e-07	<0.001	0019752: carboxylic acid metabolism
56	64	281	0.34	3.5e-07	<0.001	0006082: organic acid metabolism
57	18	41	0.76	3.7e-07	<0.001	0016125: sterol metabolism
58	362	2367	0.138	4.3e-07	<0.001	0005634: nucleus
59	364	2386	0.137	5.1e-07	<0.001	0005515: protein binding/protein amino acid binding
60	28	86	0.552	5.1e-07	<0.001	0000323: lytic vacuole
61	28	86	0.552	5.1e-07	<0.001	0005764: lysosome
62	55	231	0.364	5.2e-07	<0.001	0006118: electron transport/electron transfer
63	63	278	0.337	5.2e-07	<0.001	0000267: cell fraction
64	39	142	0.447	5.3e-07	<0.001	0006066: alcohol metabolism
65	29	92	0.532	6.9e-07	<0.001	0005773: vacuole
66	279	1770	0.15	9.5e-07	<0.001	0044267: cellular protein metabolism
67	11	18	1.048	1.1e-06	<0.001	0016126: sterol biosynthesis
68	11	18	1.048	1.1e-06	<0.001	0004364: glutathione transferase activity/glutathione S-transferase
69	280	1782	0.148	1.2e-06	<0.001	0019538: protein metabolism/protein metabolism and modification
70	19	48	0.684	1.2e-06	<0.001	0005768: endosome
71	30	101	0.495	1.8e-06	<0.001	0016853: isomerase activity
72	146	833	0.2	1.9e-06	<0.001	0005524: ATP binding
73	16	38	0.729	3.3e-06	0.001	0008203: cholesterol metabolism
74	104	558	0.231	4e-06	0.001	0044248: cellular catabolism
75	147	851	0.192	4.1e-06	0.001	0030554: adenyl nucleotide binding
76	114	633	0.213	7.5e-06	0.002	0000004: biological process unknown
77	41	169	0.375	8.6e-06	0.003	0044262: cellular carbohydrate metabolism
78	27	93	0.481	9.4e-06	0.003	0016746: transferase activity, transferring acyl groups
79	76	388	0.256	1.4e-05	0.009	0006955: immune response
80	46	203	0.336	1.7e-05	0.013	0016192: vesicle-mediated transport/nonselective vesicle transport
81	47	209	0.332	1.7e-05	0.013	0006807: nitrogen compound metabolism
82	13	30	0.75	1.9e-05	0.015	0016627: oxidoreductase activity, acting on the CH-CH group of donors
83	74	380	0.253	2.1e-05	0.019	0016788: hydrolase activity, acting on ester bonds/esterase
84	63	310	0.276	2.3e-05	0.019	0017111: nucleoside-triphosphatase activity/nucleoside triphosphatase activity
85	57	273	0.29	2.4e-05	0.02	0006886: intracellular protein transport
86	24	82	0.486	2.5e-05	0.02	0006260: DNA replication/DNA biosynthesis/DNA synthesis
87	34	136	0.392	2.5e-05	0.02	0031410: cytoplasmic vesicle
88	34	136	0.392	2.5e-05	0.02	0016023: cytoplasmic membrane-bound vesicle
89	160	974	0.165	2.8e-05	0.026	0043169: cation binding
90	9	16	0.965	2.8e-05	0.029	0006695: cholesterol biosynthesis
91	53	250	0.299	3e-05	0.03	0005975: carbohydrate metabolism
92	25	89	0.461	3.7e-05	0.034	0016747: transferase activity, transferring groups other than amino-acyl groups
93	19	59	0.546	4e-05	0.039	0016810: hydrolase activity, acting on carbon-nitrogen (but not peptide) bonds
94	106	605	0.197	5e-05	0.044	0044249: cellular biosynthesis
95	28	107	0.419	5.3e-05	0.045	0006732: coenzyme metabolism
96	9	17	0.911	5.4e-05	0.047	0004298: threonine endopeptidase activity
97	9	17	0.911	5.4e-05	0.047	0005839: proteasome core complex (sensu Eukaryota)/20S core complex/macropain
98	39	170	0.343	5.5e-05	0.047	0000287: magnesium ion binding/magnesium binding
q<0.1
ALL COMBINED UPREGULATED and DOWNREGULATED genes in CR relative to HIGHCAL.
Size of query set: 3772
OVERREPRESENTED ATTRIBUTES
Rank	N	X	LOD	P	P-adj	GO Attribute
1	1887	6089	0.349	2.8e-103	<0.001	0050875: cellular physiological process/cell growth and/or maintenance/cell physiology
2	2065	6935	0.335	1.2e-97	<0.001	0007582: physiological process
3	1550	4802	0.347	4.4e-93	<0.001	0005622: intracellular/protoplasm
4	2093	7263	0.307	5.7e-83	<0.001	0005623: cell
5	1440	4477	0.333	8e-83	<0.001	0008152: metabolism/metabolic process
6	2084	7257	0.303	1.2e-80	<0.001	0009987: cellular process
7	1352	4151	0.335	1.9e-80	<0.001	0043226: organelle
8	1352	4151	0.335	1.9e-80	<0.001	0043229: intracellular organelle
9	1210	3660	0.334	2.7e-74	<0.001	0043231: intracellular membrane-bound organelle
10	1210	3660	0.334	2.7e-74	<0.001	0043227: membrane-bound organelle
11	1347	4219	0.318	2.8e-73	<0.001	0044237: cellular metabolism
12	1110	3291	0.341	2e-72	<0.001	0003824: catalytic activity/enzyme activity
13	827	2256	0.381	1.3e-69	<0.001	0005737: cytoplasm
14	1278	4053	0.302	1.3e-64	<0.001	0044238: primary metabolism
15	1569	5574	0.234	2.2e-45	<0.001	0005488: binding/ligand
16	661	2006	0.289	2.8e-36	<0.001	0043170: macromolecule metabolism
17	633	1911	0.291	2.2e-35	<0.001	0044260: cellular macromolecule metabolism
18	276	691	0.402	7e-29	<0.001	0009058: biosynthesis/anabolism
19	722	2367	0.238	6.2e-28	<0.001	0005634: nucleus
20	569	1770	0.266	8.6e-28	<0.001	0044267: cellular protein metabolism
21	570	1782	0.263	3.1e-27	<0.001	0019538: protein metabolism/protein metabolism and modification
22	388	1134	0.299	2.8e-24	<0.001	0016740: transferase activity
23	577	1864	0.24	1.1e-23	<0.001	0043283: biopolymer metabolism
24	236	605	0.382	3.8e-23	<0.001	0044249: cellular biosynthesis
25	436	1337	0.268	1.7e-22	<0.001	0016787: hydrolase activity
26	158	389	0.406	9.2e-18	<0.001	0009059: macromolecule biosynthesis
27	576	1970	0.201	1.6e-17	<0.001	0006139: nucleobase, nucleoside, nucleotide and nucleic acid metabolism
28	204	558	0.333	1.7e-16	<0.001	0005739: mitochondrion
29	526	1810	0.195	1.9e-15	<0.001	0003676: nucleic acid binding
30	138	344	0.396	3.6e-15	<0.001	0006412: protein biosynthesis
31	664	2386	0.171	5.6e-15	<0.001	0005515: protein binding/protein amino acid binding
32	138	346	0.392	6.3e-15	<0.001	0006091: generation of precursor metabolites and energy/energy pathways
33	176	480	0.334	1.5e-14	<0.001	0016491: oxidoreductase activity/redox activity
34	442	1498	0.201	3.6e-14	<0.001	0006810: transport
35	335	1079	0.23	5.1e-14	<0.001	0000166: nucleotide binding
36	139	358	0.372	6.1e-14	<0.001	0005783: endoplasmic reticulum/ER
37	449	1532	0.197	7.2e-14	<0.001	0051179: localization/establishment and maintenance of position/establishment and maintenance of substrate location/positioning
38	445	1517	0.197	8.1e-14	<0.001	0051234: establishment of localization
39	325	1059	0.221	6.6e-13	<0.001	0017076: purine nucleotide binding
40	572	2069	0.163	2.5e-12	<0.001	0050789: regulation of biological process/regulation
41	101	245	0.414	2.6e-12	<0.001	0030529: ribonucleoprotein complex/RNP
42	913	3516	0.133	2.7e-12	<0.001	0016020: membrane
43	206	615	0.274	2.7e-12	<0.001	0009056: catabolism
44	126	334	0.351	9.5e-12	<0.001	0006629: lipid metabolism
45	142	391	0.325	1.2e-11	<0.001	0015031: protein transport/enzyme transport
46	125	332	0.349	1.3e-11	<0.001	0016462: pyrophosphatase activity
47	125	334	0.345	2.1e-11	<0.001	0016818: hydrolase activity, acting on acid anhydrides, in phosphorus-containing anhydrides
48	125	334	0.345	2.1e-11	<0.001	0016817: hydrolase activity, acting on acid anhydrides
49	530	1921	0.16	2.7e-11	<0.001	0050794: regulation of cellular process
50	110	285	0.366	3.9e-11	<0.001	0005794: Golgi apparatus/Golgi complex/Golgi ribbon
51	186	558	0.269	5.1e-11	<0.001	0044248: cellular catabolism
52	214	664	0.248	6.1e-11	<0.001	0016043: cell organization and biogenesis
53	297	989	0.206	1e-10	<0.001	0043412:
54	112	298	0.347	1.7e-10	<0.001	0003723: RNA binding
55	142	404	0.303	1.8e-10	<0.001	0045184: establishment of protein localization/protein positioning/protein recruitment
56	256	833	0.219	1.8e-10	<0.001	0005524: ATP binding
57	73	169	0.447	2.2e-10	<0.001	0044262: cellular carbohydrate metabolism
58	92	231	0.388	2.2e-10	<0.001	0006118: electron transport/electron transfer
59	146	421	0.294	2.9e-10	<0.001	0008104: protein localization
60	85	209	0.403	3.1e-10	<0.001	0006807: nitrogen compound metabolism
61	97	250	0.369	4e-10	<0.001	0005975: carbohydrate metabolism
62	332	1141	0.187	4.6e-10	<0.001	0043167: ion binding
63	332	1141	0.187	4.6e-10	<0.001	0046872: metal ion binding/metal binding
64	258	851	0.21	6.9e-10	<0.001	0030554: adenyl nucleotide binding
65	59	129	0.491	8e-10	<0.001	0005840: ribosome
66	502	1845	0.15	9.2e-10	<0.001	0051244: regulation of cellular physiological process
67	275	924	0.199	1.4e-09	<0.001	0006464: protein modification
68	112	310	0.32	2.5e-09	<0.001	0017111: nucleoside-triphosphatase activity/nucleoside triphosphatase activity
69	100	268	0.342	2.6e-09	<0.001	0044255: cellular lipid metabolism
70	512	1903	0.143	3.5e-09	<0.001	0050791: regulation of physiological process
71	61	142	0.442	8.4e-09	<0.001	0006066: alcohol metabolism
72	77	195	0.381	1e-08	<0.001	0009308: amine metabolism
73	93	250	0.339	1.1e-08	<0.001	0031090: organelle membrane
74	196	633	0.221	1.4e-08	<0.001	0000004: biological process unknown
75	349	1247	0.162	2e-08	<0.001	0043234: protein complex
76	62	148	0.423	2e-08	<0.001	0003735: structural constituent of ribosome/ribosomal protein
77	205	672	0.212	2.4e-08	<0.001	0016772: transferase activity, transferring phosphorus-containing groups
78	128	380	0.273	2.6e-08	<0.001	0016788: hydrolase activity, acting on ester bonds/esterase
79	41	84	0.543	3e-08	<0.001	0008202: steroid metabolism
80	127	378	0.272	3.5e-08	<0.001	0046907: intracellular transport
81	173	553	0.227	4.6e-08	<0.001	0006996: organelle organization and biogenesis
82	26	44	0.718	7.4e-08	<0.001	0006694: steroid biosynthesis/steroidogenesis
83	183	597	0.214	9.4e-08	<0.001	0008372: cellular component unknown
84	36	72	0.563	9.6e-08	<0.001	0042254: ribosome biogenesis and assembly
85	360	1312	0.15	1.1e-07	<0.001	0003677: DNA binding
86	80	217	0.332	1.7e-07	<0.001	0005829: cytosol
87	33	65	0.576	2.1e-07	<0.001	0007046: ribosome biogenesis
88	107	315	0.278	2.2e-07	<0.001	0006915: apoptosis/type I programmed cell death
89	183	604	0.207	2.3e-07	<0.001	0016301: kinase activity/phosphokinase
90	38	80	0.52	2.4e-07	<0.001	0007028: cytoplasm organization and biogenesis
91	107	317	0.274	3.2e-07	<0.001	0012501: programmed cell death
92	113	340	0.264	3.7e-07	<0.001	0008219: cell death
93	25	44	0.679	3.8e-07	<0.001	0005830: cytosolic ribosome (sensu Eukaryota)/80S ribosome
94	114	345	0.26	4.6e-07	<0.001	0016265: death
95	42	94	0.471	4.7e-07	<0.001	0042598: vesicular fraction
96	42	94	0.471	4.7e-07	<0.001	0005792: microsome
97	55	136	0.397	5e-07	<0.001	0031410: cytoplasmic vesicle
98	55	136	0.397	5e-07	<0.001	0016023: cytoplasmic membrane-bound vesicle
99	239	834	0.173	5.4e-07	<0.001	0043228: non-membrane-bound organelle
100	239	834	0.173	5.4e-07	<0.001	0043232: intracellular non-membrane-bound organelle
101	65	170	0.357	5.4e-07	<0.001	0000287: magnesium ion binding/magnesium binding
102	28	53	0.611	5.9e-07	<0.001	0005777: peroxisome/peroxisome vesicle
103	28	53	0.611	5.9e-07	<0.001	0042579: microbody
104	96	281	0.281	6.9e-07	<0.001	0019752: carboxylic acid metabolism
105	96	281	0.281	6.9e-07	<0.001	0006082: organic acid metabolism
106	41	92	0.469	6.9e-07	<0.001	0005773: vacuole
107	68	182	0.341	8.1e-07	<0.001	0042623: ATPase activity, coupled
108	72	196	0.329	8.3e-07	<0.001	0016887: ATPase activity/ATP phosphohydrolase/adenosinetriphosphatase
109	144	464	0.22	1e-06	<0.001	0044265: cellular macromolecule catabolism
110	148	480	0.216	1.1e-06	0.001	0009057: macromolecule catabolism
111	55	140	0.376	1.5e-06	0.001	0000902: cellular morphogenesis/negative regulation of cell shape and cell size/positive regulation of cell shape and cell size/regulation of cell shape and cell size
112	94	278	0.274	1.5e-06	0.001	0016070: RNA metabolism
113	181	613	0.19	1.7e-06	0.001	0005554: molecular function unknown
114	114	355	0.241	2.2e-06	0.002	0006259: DNA metabolism
115	38	86	0.462	2.3e-06	0.002	0000323: lytic vacuole
116	38	86	0.462	2.3e-06	0.002	0005764: lysosome
117	681	2729	0.098	2.7e-06	0.002	0031224: intrinsic to membrane
118	93	278	0.267	2.8e-06	0.002	0000267: cell fraction
119	680	2727	0.097	3.1e-06	0.002	0016021: integral to membrane/transmembrane
120	51	130	0.375	3.7e-06	0.003	0008610: lipid biosynthesis
121	91	273	0.265	4.3e-06	0.003	0006886: intracellular protein transport
122	120	383	0.226	4.7e-06	0.004	0048519: negative regulation of biological process
123	354	1334	0.128	4.8e-06	0.004	0006350: transcription
124	36	82	0.457	5e-06	0.004	0004497: monooxygenase activity
125	267	974	0.146	5.8e-06	0.004	0043169: cation binding
126	13	18	0.951	6.2e-06	0.005	0008483: transaminase activity/aminotransferase
127	71	203	0.296	7.4e-06	0.006	0016192: vesicle-mediated transport/nonselective vesicle transport
128	39	93	0.423	7.9e-06	0.006	0016746: transferase activity, transferring acyl groups
129	167	571	0.184	7.9e-06	0.006	0046914: transition metal ion binding
130	15	23	0.822	8.2e-06	0.007	0016769: transferase activity, transferring nitrogenous groups
131	156	528	0.19	8.5e-06	0.007	0006950: response to stress
132	164	561	0.183	9.8e-06	0.007	0007242: intracellular signaling cascade/intracellular signalling cascade
133	34	78	0.452	1.1e-05	0.007	0016614: oxidoreductase activity, acting on CH-OH group of donors
134	22	42	0.602	1.1e-05	0.007	0016765: transferase activity, transferring alkyl or aryl (other than methyl) groups/transferase activity, transferring alkyl or aryl groups, other than methyl groups
135	62	173	0.312	1.2e-05	0.007	0006519: amino acid and derivative metabolism
136	41	101	0.399	1.2e-05	0.007	0016853: isomerase activity
137	24	48	0.562	1.3e-05	0.007	0005768: endosome
138	340	1294	0.122	1.8e-05	0.009	0019219: regulation of nucleobase, nucleoside, nucleotide and nucleic acid metabolism
139	58	162	0.311	2.2e-05	0.014	0050793: regulation of development
140	156	537	0.179	2.3e-05	0.014	0006793: phosphorus metabolism
141	156	537	0.179	2.3e-05	0.014	0006796: phosphate metabolism
142	40	100	0.388	2.3e-05	0.014	0015980: energy derivation by oxidation of organic compounds/chemoorganotrophy
143	16	27	0.718	2.4e-05	0.014	0048037: cofactor binding
144	21	41	0.582	2.8e-05	0.014	0016125: sterol metabolism
145	337	1288	0.119	2.9e-05	0.014	0045449: regulation of transcription
146	27	59	0.489	3e-05	0.014	0016810: hydrolase activity, acting on carbon-nitrogen (but not peptide) bonds
147	13	20	0.816	3.6e-05	0.02	0043086: negative regulation of enzyme activity
148	13	20	0.816	3.6e-05	0.02	0051348: negative regulation of transferase activity/transferase inhibitor
149	13	20	0.816	3.6e-05	0.02	0006469: negative regulation of protein kinase activity
150	43	112	0.359	3.8e-05	0.021	0009117: nucleotide metabolism
151	357	1377	0.114	3.8e-05	0.021	0031323: regulation of cellular metabolism
152	139	476	0.182	4.8e-05	0.026	0016773: phosphotransferase activity, alcohol group as acceptor
153	38	96	0.381	4.8e-05	0.026	0040007: growth
154	31	73	0.432	4.9e-05	0.026	0016616: oxidoreductase activity, acting on the CH-OH group of donors, NAD or NADP as acceptor
155	66	195	0.274	4.9e-05	0.026	0042578: phosphoric ester hydrolase activity
156	12	18	0.845	5e-05	0.028	0016126: sterol biosynthesis
157	107	351	0.208	5.4e-05	0.028	0048523: negative regulation of cellular process
158	32	77	0.416	6.2e-05	0.029	0016705: oxidoreductase activity, acting on paired donors, with incorporation or reduction of molecular oxygen
159	362	1406	0.109	6.2e-05	0.029	0019222: regulation of metabolism
160	21	43	0.542	7e-05	0.036	0006790: sulfur metabolism/sulphur metabolism
161	23	49	0.51	7e-05	0.036	0016051: carbohydrate biosynthesis/anabolic carbohydrate metabolism
162	46	125	0.33	7.1e-05	0.036	0051186: cofactor metabolism
163	326	1255	0.114	7.2e-05	0.036	0006355: regulation of transcription, DNA-dependent
164	13	21	0.762	7.5e-05	0.038	0008360: regulation of cell shape/negative regulation of cell shape/positive regulation of cell shape
165	331	1277	0.113	7.5e-05	0.038	0006351: transcription, DNA-dependent
166	75	231	0.247	7.6e-05	0.039	0006396: RNA processing
167	125	425	0.186	8e-05	0.04	0007049: cell cycle/cell-division cycle
168	119	402	0.189	8.7e-05	0.043	0006508: proteolysis and peptidolysis
169	119	402	0.189	8.7e-05	0.043	0044257: cellular protein catabolism
170	124	422	0.185	9e-05	0.043	0043285: biopolymer catabolism
